# Supplementary material for: Polar organic chemical integrative sampler (POCIS): application for monitoring organic micropollutants in wastewater effluent and surface water
Source: Royal Society of Chemistry journal article supplement (doi:10.1039/c1em10730e), 2011-12-23
Supplement: c1em10730e.pdf [file c1em10730e.pdf]

### Supplementary material:

Table S1: Sampling rates ( $\text{l.d}^{-1}$ ) for both water velocity ( $0.21$  and  $0.46 \text{ m.s}^{-1}$ ) and relative standard deviation between both.

| Compounds | Rs for highest velocity ( $\text{l.d}^{-1}$ ) | Rs for slowest velocity ( $\text{l.d}^{-1}$ ) | RSD (%) |
|-----------|-----------------------------------------------|-----------------------------------------------|---------|
| CARBA     | $0.33 \pm 0.04$                               | $0.32 \pm 0.07$                               | 3       |
| DIAZ      | $0.40 \pm 0.08$                               | $0.39 \pm 0.08$                               | 3       |
| ALPRA     | $0.50 \pm 0.07$                               | $0.57 \pm 0.12$                               | 10      |
| BROMA     | $0.40 \pm 0.10$                               | $0.40 \pm 0.11$                               | 1       |
| TERBU     | $0.12 \pm 0.07$                               | $0.17 \pm 0.03$                               | 27      |
| SALBU     | $0.01 \pm 0.03$                               | $0.03 \pm 0.01$                               | 49      |
| CLENBU    | $0.36 \pm 0.05$                               | $0.35 \pm 0.07$                               | 2       |
| NORDIAZ   | $0.39 \pm 0.08$                               | $0.43 \pm 0.08$                               | 7       |
| FLUOX     | $0.24 \pm 0.07$                               | $0.19 \pm 0.10$                               | 18      |
| AMI       | $0.41 \pm 0.12$                               | $0.43 \pm 0.10$                               | 4       |
| IMI       | $0.30 \pm 0.07$                               | $0.30 \pm 0.08$                               | 1       |
| DOX       | $0.41 \pm 0.11$                               | $0.41 \pm 0.12$                               | 0       |
| PARA      | $2.10\text{E-}03 \pm 0.01$                    | $7.08\text{E-}03 \pm 1.19\text{E-}02$         | 77      |
| CAF       | $0.17 \pm 0.05$                               | $0.17 \pm 0.05$                               | 1       |
| THEO      | $2.26\text{E-}03 \pm 0.01$                    | $4.38\text{E-}03 \pm 1.02\text{E-}02$         | 45      |
| ASP       | $1.03\text{E-}02 \pm 0.02$                    | $1.01\text{E-}04 \pm 7.52\text{E-}02$         | 139     |
| IBU       | $0.28 \pm 0.06$                               | $0.28 \pm 0.05$                               | 0       |
| GEM       | $0.80 \pm 0.08$                               | $0.77 \pm 0.14$                               | 3       |
| NAPRO     | $0.14 \pm 0.04$                               | $0.18 \pm 0.04$                               | 14      |
| DICLO     | $0.13 \pm 0.04$                               | $0.19 \pm 0.04$                               | 25      |
| KETO      | $0.14 \pm 0.04$                               | $0.17 \pm 0.04$                               | 14      |
| BPA       | $0.01 \pm 0.01$                               | $0.02 \pm 0.01$                               | 17      |
| 4-NP      | $0.02 \pm 0.01$                               | $0.01 \pm 0.01$                               | 21      |
| 4-t-OP    | $0.10 \pm 0.03$                               | $0.11 \pm 0.03$                               | 2       |
| 4-NP1EC   | $0.31 \pm 0.08$                               | $0.30 \pm 0.06$                               | 1       |
| 4-NP1EO   | $9.71\text{E-}03 \pm 0.01$                    | $6.65\text{E-}03 \pm 3.62\text{E-}03$         | 37      |
| 4-NP2EO   | $6.75\text{E-}03 \pm 0.01$                    | $2.43\text{E-}03 \pm 1.17\text{E-}03$         | 66      |
